## Cardiovascular Effects of and Interaction Between Calcium Blocking Drugs and Anesthetics in Chronically Instrumented Dogs. VI. Verapamil and Fentanyl-pancuronium

Douglas C. Hill, M.D.\* Jacques E. Chelly, M.D., Ph.D.,† Abdallah Dlewat, M.D.,‡  
Darrell R. Abernethy, M.D., Ph.D.,§ Marie-Françoise Doursout, Ph.D.,¶  
Robert G. Merin, M.D.\*\*

To assess the interaction between verapamil and fentanyl-pancuronium, dogs were chronically instrumented to measure heart rate; PR interval; aortic, left ventricular, and left atrial pressures; and coronary, carotid, and renal blood flows. The effect of fentanyl citrate infusion on single-dose verapamil pharmacokinetics was examined in six animals. The effects of verapamil infusion ( $3 \mu\text{g} \cdot \text{kg}^{-1} \cdot \text{min}^{-1}$  and  $6 \mu\text{g} \cdot \text{kg}^{-1} \cdot \text{min}^{-1}$ ) were examined in the conscious state and during fentanyl infusion plus pancuronium on two separate occasions in nine dogs. In addition, the effects of fentanyl citrate ( $500 \mu\text{g} \cdot \text{kg}^{-1}$  followed by  $1.5 \mu\text{g} \cdot \text{kg}^{-1} \cdot \text{min}^{-1}$ ) were examined over 1 h of infusion. Fentanyl infusion did not affect single-dose verapamil pharmacokinetics. In the conscious animals, verapamil increased heart rate and PR interval, and slightly decreased LV dP/dt. Fentanyl combined with pancuronium increased mean arterial pressure and LV dP/dt. During fentanyl infusion, verapamil decreased mean arterial pressure and LV dP/dt, increased PR interval, and did not change heart rate. The hemodynamic effects of fentanyl infusion were steady over 1 h. In contrast to the inhalational anesthetics, which alter verapamil pharmacokinetics and have mainly additive effects with verapamil on left ventricular contractility, cardiac conduction, and regional blood flows, fentanyl-pancuronium had no effect on verapamil pharmacokinetics and minimal effect on verapamil pharmacodynamics in healthy dogs. (Key words: Anesthetics, intravenous: fentanyl. Heart: ventricular function. Interactions: drug. Pharmacokinetics: verapamil. Pharmacology, calcium channel blocking drug: verapamil.)

IT HAS PREVIOUSLY been demonstrated that the cardiovascular interactions between calcium channel

blocking drugs and anesthetics are dependent upon both pharmacokinetic and pharmacodynamic interactions.<sup>1-3</sup> High-dose fentanyl anesthesia, up to  $150 \mu\text{g} \cdot \text{kg}^{-1}$ , has been advocated for patients with cardiovascular disease, particularly those with decreased cardiac reserve.<sup>4</sup> Verapamil may be indicated in many of these same surgical patients for treatment of supraventricular arrhythmias, hypertension, or myocardial ischemia. Therefore, documenting the cardiovascular interactions between verapamil and fentanyl is important. A previous clinical study involving a population of patients receiving beta adrenergic blocking drugs, nitrates, and nifedipine examined the hemodynamic effects of verapamil after large doses of fentanyl.<sup>5</sup> However, beta blocking drugs have been demonstrated to interact with nifedipine<sup>6</sup> and verapamil.<sup>7</sup> This study assessed the effects of fentanyl and pancuronium on verapamil pharmacokinetics. We also examined the effects of verapamil and fentanyl-pancuronium alone, and in combination, on the cardiovascular system of conscious, chronically instrumented dogs.

### Materials and Methods

#### INSTRUMENTATION

Details of the basic model have been previously published.<sup>1</sup> Briefly, nine healthy dogs, free of heart worms and weighing an average of  $19.8 \pm 1.5 \text{ kg}$  (SEM), were instrumented as follows: Tygon® catheters (Tygon, Norton, Inc., Akron, OH) in the left atrium and thoracic aorta; pulsed Doppler flow probes (Baylor College of Medicine, Houston, TX) around the circumflex coronary, left common carotid, and left renal arteries; an electromagnetic flow probe (Micron Inc.®, Los Angeles, CA) around the pulmonary artery; and a high-fidelity pressure transducer (Konigsberg Inc.®, Los Angeles, CA) in the left ventricular cavity. All animals were studied at least 10 days after surgery, when they were afebrile and trained to lie quietly on their right sides. Periodic blood counts demonstrated that the dogs maintained their hematocrits throughout the study period. Details of the measurement techniques have been previously described.<sup>1</sup> Doppler flow probes were calibrated

\* Research Fellow, Department of Anesthesiology, University of Texas Medical School at Houston.

† Associate Professor, Departments of Anesthesiology, Pharmacology, and Medicine, Baylor College of Medicine. Present address: Lederle Laboratories, Pearl River, New York.

‡ Research Fellow, Department of Anesthesiology, Baylor College of Medicine.

§ Associate Professor, Department of Medicine, Baylor College of Medicine. Present address: Department of Medicine, Brown University Medical School, Providence, Rhode Island.

¶ Research Instructor, Department of Anesthesiology, Baylor College of Medicine.

\*\* Professor, Department of Anesthesiology, University of Texas Medical School at Houston.

Received from the Departments of Anesthesiology, Pharmacology, and Medicine, Baylor College of Medicine, Houston, Texas; and the Department of Anesthesiology, University of Texas Medical School at Houston, Houston, Texas. Accepted for publication January 14, 1988. Supported in part by a grant from Janssen Pharmaceutica.

Address reprint requests to Dr. Merin: Department of Anesthesiology, University of Texas Health Science Center at Houston, Houston, Texas 77030.

in terms of frequency shifts. Aortic, left ventricular, and left atrial pressures; cardiac output; and carotid, coronary, and renal blood flows were continuously recorded on a Gould polygraph (Gould Inc.<sup>®</sup>, Cleveland, OH) during the experiments. Cardiac output was measured using a Micron RC 1000 electromagnetic flowmeter. Left ventricular dP/dt was derived electronically.

## PROTOCOLS

*Effect of Fentanyl Infusion on the Pharmacokinetics of Single-dose Verapamil.* The pharmacokinetics of single injections of verapamil in the conscious animal and during infusion of fentanyl (and paralysis with pancuronium) were studied on two separate occasions in six dogs. Experiments were separated by at least 4 days, and the order was randomly assigned.

*Experiment I.* Verapamil was injected in a dose of  $200 \mu\text{g} \cdot \text{kg}^{-1}$  over 10 min. Aortic blood samples (3 ml) were collected prior to and 1, 3, 5, 10, 15, 30, and 45 min after, and 1, 2, 3, 4, and 5 h after verapamil. In addition, cardiac function was continuously recorded before and for 60 min after verapamil.

*Experiment II.* After conscious hemodynamic measurement, animals received fentanyl citrate  $500 \mu\text{g} \cdot \text{kg}^{-1}$  followed by  $1.5 \mu\text{g} \cdot \text{kg}^{-1} \cdot \text{min}^{-1}$  for the remainder of the experiment, and pancuronium  $0.1 \text{ mg} \cdot \text{kg}^{-1}$  followed by intermittent  $0.02 \text{ mg} \cdot \text{kg}^{-1}$  doses as needed. Fentanyl dosing was based on the findings of two studies that investigated the anesthetic properties of fentanyl in dogs.<sup>8,9</sup> Bailey *et al.* reported that the anesthetic ED<sub>50</sub> for fentanyl citrate 5 min after administration of a single bolus was  $329 \mu\text{g} \cdot \text{kg}^{-1}$  in untrained dogs.<sup>8</sup> In addition, Arndt *et al.* have reported the effects of five separate fentanyl injections to a cumulative dose of  $165.7 \mu\text{g} \cdot \text{kg}^{-1}$  administered over 20 min in trained dogs. Fentanyl abolished all heart rate and blood pressure increases in response to tail clamping for over 45 min after the last injection.<sup>9</sup> The fentanyl infusion dose was calculated from published fentanyl pharmacokinetic data in mechanically ventilated dogs paralyzed with pancuronium.<sup>††</sup> The trachea was intubated and ventilation was controlled using a Harvard ventilator (Harvard Apparatus<sup>®</sup>, So. Natick, MA) at tidal volumes of  $10\text{--}15 \text{ ml} \cdot \text{kg}^{-1}$  with the rate adjusted to maintain arterial carbon dioxide tension as in the conscious animal. Each animal served as its own control for each experiment. Ventilation was maintained with oxygen and nitrogen in concentrations that kept arterial oxy-

gen tension at approximately the same levels as in the conscious animal. Rectal temperature was maintained throughout the experiment by external heating if necessary. Verapamil  $200 \mu\text{g} \cdot \text{kg}^{-1}$  was injected as in experiment I only after the heart rate and blood pressure had been stable for 20 min in the presence of fentanyl infusion.

During the fentanyl infusion, end-tidal carbon dioxide (Lifespan 100<sup>®</sup>, Biochem International Inc., Waukesha, WI) concentration was continuously monitored using infrared absorption techniques. Arterial blood gas determinations were made at intervals during anesthesia using a Radiometer ABC<sup>®</sup> electrode system (Radiometer, Inc., Denmark). Rectal temperature was measured with a thermocouple probe (Yellow Springs Instruments<sup>®</sup>, Yellow Springs, OH). The animals were placed in a right lateral decubitus position (the same position as conscious), and they received  $3\text{--}5 \text{ ml} \cdot \text{kg}^{-1} \cdot \text{h}^{-1}$  lactated Ringer's solution during the experiment.

*Effect of Fentanyl Infusion on Cardiac Responses to Verapamil Infusion.* Nine conscious dogs received a steady-state infusion of verapamil ( $200 \mu\text{g} \cdot \text{kg}^{-1}$  iv over 3 min, followed by  $3 \mu\text{g} \cdot \text{kg}^{-1} \cdot \text{min}^{-1}$  for 27 min, then another  $200 \mu\text{g} \cdot \text{kg}^{-1}$  over 3 min, followed by  $6 \mu\text{g} \cdot \text{kg}^{-1} \cdot \text{min}^{-1}$  for 27 min). On another occasion, separated by at least 4 days and in randomly assigned order, these same dogs received an identical verapamil infusion in the presence of fentanyl citrate ( $500 \mu\text{g} \cdot \text{kg}^{-1}$ , followed by  $1.5 \mu\text{g} \cdot \text{kg}^{-1} \cdot \text{min}^{-1}$ ) and pancuronium ( $0.1 \text{ mg} \cdot \text{kg}^{-1}$ ). Verapamil infusion was begun after heart rate and blood pressure had been stable for 20 min in the presence of fentanyl infusion. Fluid volumes, ventilation, and monitoring for the dogs receiving fentanyl-pancuronium were the same as described in experiment II. Hemodynamic values and aortic blood samples were collected before and at 27 min during the  $3 \mu\text{g} \cdot \text{kg}^{-1} \cdot \text{min}^{-1}$  and  $6 \mu\text{g} \cdot \text{kg}^{-1} \cdot \text{min}^{-1}$  steady-state verapamil infusions.

*Effect of Fentanyl Infusion and Paralysis with Pancuronium on Cardiac Function.* To determine whether the cardiovascular effects of fentanyl infusion were constant in the absence of verapamil in an equivalent period of time to protocol 2, six dogs were given fentanyl citrate ( $500 \mu\text{g} \cdot \text{kg}^{-1}$ , followed by  $1.5 \mu\text{g} \cdot \text{kg}^{-1} \cdot \text{min}^{-1}$ ) and pancuronium ( $0.1 \text{ mg} \cdot \text{kg}^{-1}$ ). After the heart rate and blood pressure had been stable for 20 min in the presence of fentanyl infusion, the time control study was started. The verapamil infusions in protocol 2 and the time controls in protocol 3 were all begun within 35 min after starting the fentanyl infusions. Fluid volumes, ventilation, and monitoring were maintained as described in experiment II. Hemodynamic values were recorded immediately before, and 30 and 60 min after, starting this time control study.

†† Borel JD, Bentley JE, Gillespie TJ, Gandolfi AJ, Brown BR: Pharmacokinetics of intravenous sufentanil (abstract). ANESTHESIOLOGY 55:A251, 1981

TABLE 1. Effects of Fentanyl Infusion Plus Pancuronium on Verapamil Pharmacokinetics

|                                 |     | Verapamil       | Verapamil<br>+ Fentanyl |
|---------------------------------|-----|-----------------|-------------------------|
| $V_1$                           | 1   | $40 \pm 4$      | $36 \pm 4$              |
| Intercompartmental<br>clearance | 1/h | $211 \pm 36$    | $192 \pm 44$            |
| $V_{dss}$                       | 1   | $101 \pm 17$    | $100 \pm 14$            |
| Total clearance                 | 1/h | $54 \pm 6$      | $64 \pm 9$              |
| beta- $t_{1/2}$                 | hr  | $1.64 \pm 0.27$ | $1.54 \pm 0.15$         |

Mean  $\pm$  SEM.

## SAMPLE ANALYSIS

Blood specimens for verapamil were drawn into "ve-nject" (Becton-Dickinson®, Rutherford, NJ) heparinized tubes, centrifuged, and the plasma separated and stored at  $-20^\circ\text{C}$  until analyzed. Concentrations of verapamil were analyzed by gas-liquid chromatography using nitrogen-phosphorus detection.<sup>10</sup>

## PHARMACOKINETIC DATA ANALYSIS

After intravenous verapamil infusion, post-infusion plasma drug concentrations (c) were fitted to equations formed by a linear sum of two exponential terms using iterative weighted ( $1/C^2$ ) nonlinear least-squares regression analysis. The program used was MLAB® in the PROPHET® network. After correction of the derived coefficients for the infusion time,<sup>11</sup> the pharmacokinetic functions were used to calculate the elimination half-life, total apparent volume of distribution using the steady-state method, and total clearance.<sup>12</sup> In addition, central compartment volume ( $V_1$ ) and the micro-rate constant, describing movement of verapamil from central to peripheral compartments ( $K_{12}$ ), were determined from the pharmacokinetic function, and intercompartmental clearance (Q) from the central compartment to the peripheral compartment was determined by the relationship:  $Q = K_{12} \times V_1$ .<sup>13</sup>

## DATA ANALYSIS

The effects of verapamil alone and during fentanyl-pancuronium and the effects of fentanyl-pancuronium with time were analyzed using a one-way analysis of variance and BMDP statistical software. Alpha was set at a level of 0.05. When significant ( $P < 0.05$  with ANOVA), multiple paired comparisons were applied. However, for each paired comparison, the appropriate level of alpha was determined according to the Bonferroni method.<sup>14</sup> The changes produced by verapamil were assessed by comparing the values recorded at each dose level with: 1) their respective baseline values recorded awake or during fentanyl-pancuronium (\*), and 2) the values obtained at the same dose level with vera-

pamil in awake dogs (†). Data are presented as mean  $\pm$  SEM.

## Results

## EFFECTS OF FENTANYL INFUSION ON SINGLE-DOSE VERAPAMIL PHARMACOKINETICS

Fentanyl infusion plus pancuronium did not affect single-dose verapamil pharmacokinetics (table 1).

## EFFECTS OF FENTANYL INFUSION ON CARDIAC RESPONSES TO VERAPAMIL INFUSION

Nine animals were studied. However, not all values were reported for each animal (see "n" in the tables) because of catheter and flow probe failures. Verapamil, at both infusion rates, increased heart rate and PR intervals while decreasing left ventricular dP/dt (fig. 1). The only significant changes induced by fentanyl alone (with pancuronium) were increases in mean arterial pressure and left ventricular dP/dt (table 2).

During fentanyl infusion, left ventricular dP/dt was decreased by both 3 and  $6 \mu\text{g} \cdot \text{kg}^{-1} \cdot \text{min}^{-1}$  verapamil, while the PR interval was increased in a dose-related manner just as that seen with verapamil in the conscious state (figs. 1, 2). However, unlike in the conscious state, mean arterial pressure was decreased by both doses of verapamil, and heart rate was not changed.

As one would expect from the pharmacokinetic data, plasma levels of verapamil did not differ in the same dogs during fentanyl infusion compared to the conscious state (table 3).

## EFFECT OF FENTANYL INFUSION ON CARDIAC FUNCTION

This time control study showed no significant change in the hemodynamic effect of fentanyl (plus pancuronium) after 30 and 60 min of infusion compared to control (table 4).

## Discussion

Fentanyl infusion plus pancuronium did not affect single-dose verapamil pharmacokinetics or verapamil plasma concentration during steady-state infusion. This is markedly different from the effects seen with either inhalational anesthetics<sup>3</sup> or local anesthetics.<sup>15</sup> Verapamil plasma concentrations and verapamil-induced cardiovascular depression are greater during inhalational anesthesia than in the conscious state.<sup>1,2</sup> It has been shown that the greater cardiovascular depression observed from verapamil infusion during inhalational anesthesia is, at least in part, due to these pharmacokinetic interactions.<sup>16</sup> In fact, when verapamil infusion doses

were adjusted to obtain similar plasma concentrations in the conscious state and during inhalational anesthesia, very little hemodynamic interaction was observed.<sup>16</sup> Thus, the minimal effect of fentanyl, as compared to the inhalational agents, on verapamil hemodynamics when using the same dose of verapamil and the same

TABLE 2. Effects of Fentanyl on Cardiac Hemodynamics and Regional Blood Flow

|                                                                 | (n) | Awake          | Fentanyl         |
|-----------------------------------------------------------------|-----|----------------|------------------|
| HR ( $\text{min}^{-1}$ )                                        | 9   | $82 \pm 3$     | $93 \pm 8$       |
| MAP (mmHg)                                                      | 9   | $98 \pm 3$     | $128 \pm 4^*$    |
| LAP (mmHg)                                                      | 6   | $3.3 \pm 1.1$  | $7.0 \pm 1.8$    |
| CO ( $\text{l} \cdot \text{min}^{-1}$ )                         | 5   | $2.0 \pm 0.2$  | $2.5 \pm 0.4$    |
| LVdP/dt ( $\text{mmHg} \cdot \text{sec}^{-1}$ )                 | 8   | $3410 \pm 202$ | $4644 \pm 244^*$ |
| PR (msec)                                                       | 9   | $112 \pm 5$    | $114 \pm 5$      |
| CaF ( $\text{ml} \cdot \text{min}^{-1}$ )                       | 6   | $145 \pm 19$   | $143 \pm 19$     |
| CoF ( $\text{ml} \cdot \text{min}^{-1}$ )                       | 5   | $43 \pm 12$    | $57 \pm 18$      |
| ReF ( $\text{ml} \cdot \text{min}^{-1}$ )                       | 7   | $92 \pm 10$    | $105 \pm 15$     |
| SVR ( $\text{mmHg} \cdot \text{l}^{-1} \cdot \text{min}^{-1}$ ) | 5   | $52 \pm 4$     | $56 \pm 7$       |

Mean  $\pm$  SEM; HR = heart rate; MAP = mean aortic blood pressure; LAP = mean left atrial blood pressure; CO = cardiac output; LVdP/dt = maximum rate of rise of left ventricular pressure; PR = P-R interval; CaF = carotid blood flow, CoF = coronary blood flow; ReF = renal blood flow; SVR = systemic vascular resistance.  
\*  $P < 0.05$  vs. Awake.

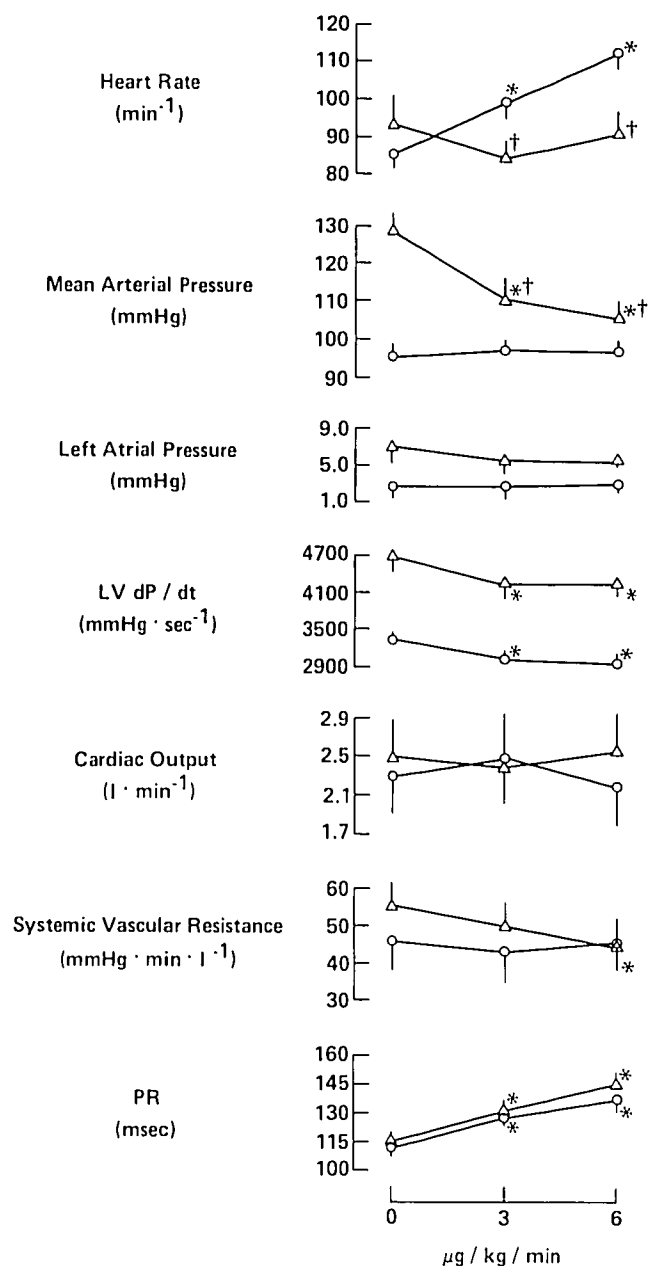

FIG. 1. Effects of verapamil infusions in doses of 0, 3, and 6  $\mu\text{g} \cdot \text{kg}^{-1} \cdot \text{min}^{-1}$  on cardiac function in awake (O) and in fentanyl-anesthetized ( $\Delta$ ) dogs. \* $P < 0.05$  versus 0 (respective control values prior to verapamil infusions)  $\dagger P < 0.05$  versus values recorded at the same dose level during verapamil infusions in awake dogs. For legends see table 2.

dog model can be partly explained by the absence of pharmacokinetic interaction.

The effects of verapamil infusion in the conscious dog were minimal, and were similar to those observed in our previous studies. Fentanyl-pancuronium alone increased mean arterial pressure and left ventricular dP/dt without significantly altering heart rate or left atrial pressure. Fentanyl was not used as an anesthetic *per se* to instrument the animal, but, rather, to study a drug interaction in an unstimulated animal. The dose of fentanyl (1.5 times the  $\text{ED}_{50}$ ) was chosen to compare the effects of verapamil in the presence of fentanyl to the effects of verapamil previously observed in the presence of the inhalational anesthetics using the same dog model.<sup>1,2</sup> The two previous studies, which examined the effects of fentanyl in conscious dogs, reported similar increases in mean arterial pressure, although the doses of fentanyl were smaller.<sup>9,17</sup> Two different groups have reported that fentanyl decreases heart rate in spontane-

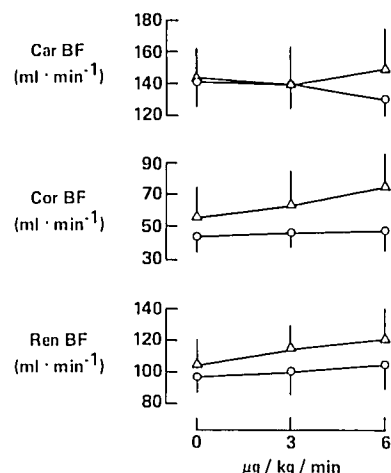

FIG. 2. Effects of verapamil infusions in doses of 0, 3, and 6  $\mu\text{g} \cdot \text{kg}^{-1} \cdot \text{min}^{-1}$  on regional blood flow in awake (O) and in fentanyl-anesthetized ( $\Delta$ ) dogs. For legends see table 2.

TABLE 3. Plasma Verapamil Concentration (ng/ml)

|          | n | Verapamil Dose ( $\mu\text{g} \cdot \text{kg}^{-1} \cdot \text{min}^{-1}$ ) |              |
|----------|---|-----------------------------------------------------------------------------|--------------|
|          |   | 3                                                                           | 6            |
| Awake    | 9 | $69 \pm 6$                                                                  | $130 \pm 14$ |
| Fentanyl | 9 | $76 \pm 6$                                                                  | $152 \pm 11$ |

Mean  $\pm$  SEM.

ously breathing dogs.<sup>8,9</sup> We noted no significant heart rate changes in our dogs that received fentanyl and pancuronium and whose tracheas were intubated. The vagolytic properties of pancuronium<sup>18</sup> and, possibly, the stimulatory effects of endotracheal intubation blocked the vagotonic action of fentanyl in our study. On the basis of data presented in tables 2 and 4, it is possible to confirm Priano's report that low-dose fentanyl does not significantly affect renal blood flow.<sup>17</sup> In addition, we noted no significant change in coronary or carotid blood flow in the presence of fentanyl-pancuronium. Of particular importance was the demonstration that the hemodynamic effects of fentanyl did not significantly change over 1 h of continuous infusion. This allowed us to interpret the effects of verapamil infusion in the presence of fentanyl-pancuronium as being due to verapamil and not to a change in fentanyl-induced hemodynamics over time.

Fentanyl-pancuronium had minimal effect on the hemodynamic response to verapamil infusion, except for its effect on heart rate and mean arterial pressure changes. In the conscious dogs, verapamil produced a decrease in left ventricular dP/dt, a reflex tachycardia, and no change in mean arterial pressure. Nakaya *et al.* have proposed three explanations for this reflex tachycardia.<sup>19</sup> First, verapamil-induced reductions in myocardial contractility may stimulate ventricular mechanoreceptors that decrease vagal afferent tone and increase sympathetic outflow to the heart. Second, verapamil may directly increase cardiac sympathetic, and decrease cardiac parasympathetic, activity, and, third, verapamil may alter baroreceptor sensitivity. Fentanyl blocked the reflex tachycardia response seen with verapamil in the

conscious animal. This is probably due to the central effect fentanyl has of reducing sympathetic tone and increasing vagal tone.<sup>20</sup> Similarly, clinical studies have shown no heart rate change, despite reductions in mean arterial pressure and systemic vascular resistance following bolus verapamil in patients with good left ventricular function during narcotic-based anesthesia.<sup>5,21,22</sup> Verapamil produced similar small reductions in left ventricular dP/dt in the presence and absence of fentanyl-pancuronium, despite the lack of reflex tachycardia in the animals receiving fentanyl-pancuronium.

In contrast to the effects seen with the inhalational anesthetics in this same model, neither fentanyl-pancuronium alone nor verapamil in the presence of fentanyl-pancuronium significantly altered regional blood flows. One animal markedly increased coronary blood flow in response to verapamil in the presence of fentanyl-pancuronium, which increased the average change. However, the other dogs showed little or no change in coronary flow. The maintenance of regional blood flows, despite a decrease in mean arterial pressure, suggests that autoregulation was preserved in the presence of fentanyl-pancuronium.

Fentanyl had no effect on cardiac conduction, which is also different from the inhalational anesthetics. Verapamil increased the PR interval to the same degree in the presence of fentanyl as it did in the conscious animal, and no animals developed A-V block or sinus arrest. This is markedly different from the previously published effects of verapamil during inhalational anesthesia using this same model and same verapamil dosing regimen. Verapamil increased the PR interval to a greater degree during high-dose halothane anesthesia than in the conscious state, and several animals developed A-V block, and even sinus arrest, during inhalational anesthesia.<sup>1,2</sup> However, when verapamil infusion doses were adjusted to obtain similar plasma verapamil concentrations, in the conscious state and during inhalational anesthesia, no effect on cardiac conduction was noted.<sup>16</sup>

In contrast to the inhalational anesthetics, which alter verapamil pharmacokinetics and have mainly additive effects with verapamil on left ventricular contractility, cardiac conduction, and regional blood flows, fentanyl-pancuronium had no effect on verapamil pharmacokinetics, and minimal effect on verapamil pharmacodynamics in healthy dogs.

The authors wish to thank Irene McDonald for manuscript preparation and Christine Lawrence for technical assistance.

## References

- Chelly JE, Rogers K, Hysing ES, Taylor A, Hartley C, Merin RG: Cardiovascular effects of and interaction between calcium

TABLE 4. Hemodynamic Effects of Fentanyl-pancuronium

|                                                 | n | Control        | 30 Min         | 60 Min         |
|-------------------------------------------------|---|----------------|----------------|----------------|
| HR ( $\text{min}^{-1}$ )                        | 6 | $90 \pm 5$     | $82 \pm 6$     | $80 \pm 5$     |
| MAP (mmHg)                                      | 6 | $121 \pm 7$    | $117 \pm 8$    | $116 \pm 8$    |
| LVdP/dt ( $\text{mmHg} \cdot \text{sec}^{-1}$ ) | 5 | $3919 \pm 520$ | $3799 \pm 435$ | $3804 \pm 360$ |
| ReF ( $\text{ml} \cdot \text{min}^{-1}$ )       | 4 | $129 \pm 13$   | $134 \pm 9$    | $130 \pm 7$    |
| PR (msec)                                       | 6 | $117 \pm 6$    | $117 \pm 6$    | $113 \pm 7$    |

Mean  $\pm$  SEM. HR = heart rate; MAP = mean aortic blood pressure; LVdP/dt = maximum rate of rise of left ventricular pressure; ReF = renal blood flow; PR = P-R interval.

- blocking drugs and anesthetics in chronically instrumented dogs. I. Verapamil and halothane. *ANESTHESIOLOGY* 64:560-567, 1986
2. Rogers K, Hysing ES, Merin RG, Taylor A, Hartley C, Chelly JE: Cardiovascular effects of and interaction between calcium blocking drugs and anesthetics in chronically instrumented dogs. II. Verapamil, enflurane and isoflurane. *ANESTHESIOLOGY* 64:568-575, 1986
3. Chelly JE, Hysing ES, Abernethy DR, Doursout M-F, Merin RG: Effects of inhalational anesthetics on verapamil pharmacokinetics in dogs. *ANESTHESIOLOGY* 65:266-271, 1986
4. Lowenstein E, Philbin DM: Narcotic "anesthesia" in the eighties. *ANESTHESIOLOGY* 55:195-197, 1981
5. Kapur PA, Norel EJ, Dajee H, Cohen G, Flacke W: Hemodynamic effects of verapamil administration after large doses of fentanyl in man. *Can Anaesth Soc J* 33:138-144, 1986
6. Wartier DC, Zyvoloski MG, Gross GJ, Brooks HL: Comparative actions of dihydropyridine slow channel calcium blocking agents in conscious dogs: Systemic and coronary hemodynamics with and without combined  $\beta$  adrenergic blockade. *J Pharmacol Exp Ther* 230:367-375, 1984
7. Hamann SR, Kaltenborn KE, Vore M, Tan TG, McAllister RG: Cardiovascular and pharmacokinetic consequences of combined administration of verapamil and propranolol in dogs. *Am J Cardiol* 56:147-156, 1985
8. Bailey PL, Port JD, McJames S, Reinersman L, Stanley TH: Is fentanyl an anesthetic in the dog? *Anesth Analg* 66:542-548, 1987
9. Arndt JO, Mikat M, Chandra P: Fentanyl's analgesic, respiratory, and cardiovascular actions in relation to dose and plasma concentration in unanesthetized dogs. *ANESTHESIOLOGY* 61:355-361, 1984
10. Abernethy DR, Todd EL, Mitchell JR: Verapamil and norverapamil determination in human plasma by gas-liquid detection: Application to single-dose pharmacokinetic studies. *Pharmacology* 29:264-268, 1984
11. Loo JCK, Riegelman S: Assessment of pharmacokinetic constants from postinfusion blood curves obtained after i.v. infusion. *J Pharm Sci* 59:53-55, 1970
12. Wagner JG: Linear pharmacokinetic equations allowing direct calculations of many needed pharmacokinetic parameters from the coefficients and exponents of poly exponential equations which have been fitted to the data. *J Pharmacokinet Biopharm* 4:443-467, 1976
13. Gibaldi M, Perrier D: Multicompartment models, *Pharmacokinetics*. New York, Marcel Dekker, 1982, pp 45-111
14. Keppel G: Correction for multiple comparisons, *Design and Analysis*. Edited by Keppel G. Englewood Cliffs, Prentice Hall, 1982, pp 144-166
15. Chelly JE, Hill DC, Abernethy DR, Dlewati A, Doursout M-F, Merin RG: Pharmacodynamic and pharmacokinetic interactions between lidocaine and verapamil. *J Pharmacol Exp Ther* 243:211-216, 1987
16. Chelly JE, Hysing ES, Hill DC, Abernethy DR, Dlewati A, Doursout M-F, Merin RG: Cardiovascular effects of and interaction between calcium blocking drugs and anesthetics in chronically instrumented dogs. V. Role of pharmacokinetics and the autonomic nervous system in the interactions between verapamil and inhalational anesthetics. *ANESTHESIOLOGY* 67:320-325, 1987
17. Priano LL: Effects of high-dose fentanyl on renal hemodynamics in conscious dogs. *Can Anaesth Soc J* 30:10-18, 1983
18. Durant NN, Marshall IG, Savage DS: The pharmacology and autonomic blocking activities of pancuronium, ORG NC45, and other pancuronium analogues in the cat. *J Pharm Pharmacol* 31:831-836, 1979
19. Nakaya H, Schwartz A, Millard RW: Reflex chronotropic and inotropic effects of calcium channel-blocking agents in conscious dogs. *Circ Res* 52:302-311, 1983
20. Laubie M, Schmitt H: Sites of the vagally mediated bradycardia induced by morphine-like agents and opioid peptides, *Central Nervous System Mechanisms in Hypertension*. Edited by Buckley JP, Ferrario CM. New York, Raven Press, 1981, pp 235-247
21. Zimpfer M, Fitzal S, Tonzcar L: Verapamil as a hypotensive agent during neuroleptanaesthesia. *Br J Anaesth* 53:885-889, 1981
22. Kates RA, Kaplan JA: Cardiovascular responses to verapamil during coronary artery bypass graft surgery. *Anesth Analg* 62:821-826, 1983
